# Manuscript Template

1 **FRONT MATTER**

2

3 **Title**

4 Using Machine Learning To Develop A Fully Automated Soybean Nodule Acquisition  
5 Pipeline (SNAP)

6

7 SNAP: The Soybean Nodule Acquisition Pipeline

8

9 **Authors**

10 Talukder Zaki Jubery,<sup>1†</sup> Clayton N. Carley,<sup>2†</sup> Arti Singh,<sup>2</sup> Soumik Sarkar,<sup>1</sup> Baskar  
11 Ganapathysubramanian,<sup>1\*</sup> Asheesh K. Singh<sup>2\*</sup>

12

13 **Affiliations**

14 <sup>1</sup> Department of Mechanical Engineering, Iowa State University, Ames, IA, USA

15 <sup>2</sup> Department of Agronomy, Iowa State University, Ames, IA, USA

16 \*To whom correspondence should be addressed; E-mail: baskarg@iastate.edu,  
17 singhak@iastate.edu

18 †These authors contributed equally to this work.

19

20 **Abstract**

21 Nodules form on plant roots through the symbiotic relationship between soybean (*Glycine max* L.  
22 Merr.) roots and bacteria (*Bradyrhizobium japonicum*), and are an important structure where  
23 atmospheric nitrogen (N<sub>2</sub>) is fixed into bio-available ammonia (NH<sub>3</sub>) for plant growth and  
24 developmental. Nodule quantification on soybean roots is a laborious and tedious task; therefore,  
25 assessment is done on a less informative qualitative scale. We report the Soybean Nodule  
26 Acquisition Pipeline (SNAP) for nodule quantification that combines RetinaNet and UNet deep  
27 learning architectures for object (i.e., nodule) detection and segmentation. SNAP was built using  
28 data from 691 unique roots from diverse soybean genotypes, vegetative growth stages, and field  
29 locations; and has a prediction accuracy of 99%. SNAP reduces the human labor and  
30 inconsistencies of counting nodules, while acquiring quantifiable traits related to nodule growth,  
31 location and distribution on roots. The ability of SNAP to phenotype nodules on soybean roots at  
32 a higher throughput enables researchers to assess the genetic and environmental factors, and their  
33 interactions on nodulation from an early development stage. The application of SNAP in research  
34 and breeding pipelines may lead to more nitrogen use efficient soybean and other legume species  
35 cultivars, as well as enhanced insight into the plant-*Bradyrhizobium* relationship.

36

37

38

39

40

## 1 MAIN TEXT

### 2 3 1. Introduction

4 The dynamic and symbiotic relationship between soybean (*Glycine max* L. Merr.) and  
5 bacteria (*Bradyrhizobium japonicum*) is largely considered mutually beneficial [1]. In  
6 a specialized root structure, known as a nodule, bacteria fix atmospheric nitrogen (N<sub>2</sub>) into a  
7 bio-available ammonia (NH<sub>3</sub>) form that is used by the host soybean plant to assist in meeting  
8 its nitrogen needs. The bacteria, in turn, acquires carbon from the host [2, 3]. Nitrogen (N)  
9 is critical for building amino acids, vegetative growth, and for protein accumulation in seed.  
10 The number of nodules formed on soybean roots can vary from only a few nodules to several  
11 hundred per plant [4]. Figure 1 shows diverse soybean genotypes at the Soybean vegetative  
12 growth stage (V5) with varying amounts of nodules, which can vary in quantity between  
13 genotypes and fluctuate along the taproot and secondary roots of the plant. Comparisons of  
14 nodulating versus non-nodulating soybean isolines show there can be a six-fold increase of  
15 nitrogen in the nodulating plant at later growth stages, demonstrating the impact of  
16 nodulation [5]. However, hyper-nodulating mutants have been shown to be inefficient, with  
17 reduced plant health and associated reduced biomass and yield [6].  
18

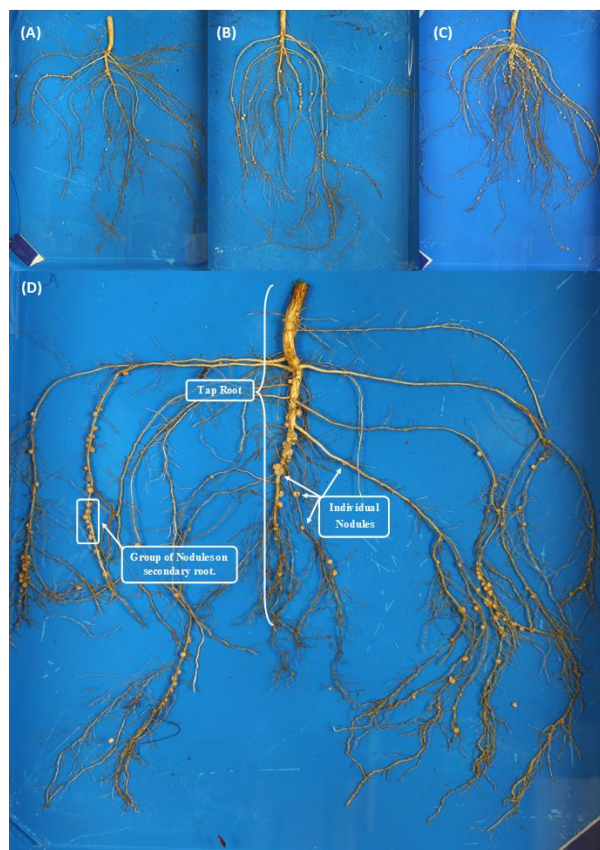

19  
20  
21 **Figure 1:** Various genotypes grown in the same field environment with (A) low, (B)  
22 moderate, and (C) high nodulation. (D) shows a typical soybean root, with the tap root,  
23 scattered (individual) nodules and groups of nodules on plant root.  
24

25 Due to the importance of nodulation in legume crops in terms of crop health and yield,  
26 numerous studies have investigated nodule distributions on roots [7, 8, 9, 10, 11]. To  
27 evaluate these nodule plant relationships, nodule evaluations have traditionally been done

1 with qualitative ratings taken on the entire root, just the tap root, secondary roots, or  
2 combinations thereof. For the primary world row crops, seed yield is one of the major  
3 breeding objectives. However, for N-fixing legume crops, much work is still required to  
4 develop and exploit an optimum balance between host genotype, nodulation amount, N  
5 rates, and positioning of nodules on the root [12, 13, 14, 15]. Therefore, plant breeders and  
6 researchers are motivated to continue the exploration of germplasm, and interactions  
7 between the plant-bacteria at multiple levels (cellular, plant, crop, eco-system) [16, 17, 18].  
8 The need to understand nodule growth and development has led to numerous nodulation  
9 studies focused on the rates and positioning of biological products [19], fertilizer application  
10 patterns [20], climate [21] soil types [22] and even herbicides [23], while evaluating N  
11 management decisions including runoff and conservation from previous years production  
12 [24] to help mitigate environmental damage and hypoxia zones [25]. Plant breeders can  
13 mitigate some of these challenges by developing more efficient and environment responsive  
14 N-fixing varieties, to positively impact plant growth and development. For both researchers  
15 and producers, a technological limitation is the inability to count and quantify the amount,  
16 shape, and location of nodules, as the arduous phenotyping task is very time consuming and  
17 can be technically challenging.

18 Due to the labor-intensive nature of studies on nodule count and its health, researchers  
19 have traditionally used qualitative ratings that are based on tap root nodulation representing  
20 the entire root, including secondary root branches [26]. Later, more descriptive scales were  
21 developed to assist with nodule counting and ratings. These include numerical qualitative  
22 scales (ratings 1 to 10), where rating ‘1’ represents few nodules on the taproot and rating  
23 ‘10’ with much of the taproot nodulated [27]. In the next rating iteration, nodule  
24 quantification included all roots (tap and lateral). There have been attempts to use both  
25 nodule count and size and more simple numerical scales to make the rating system more  
26 informative [27, 28]. However, the lack of automation has hindered large experiments that  
27 use high throughput phenotyping to assess a more exhaustive number of genotypes and  
28 often forces much of the distribution of nodule counts into qualitative categories limiting  
29 more in-depth statistical analysis and evaluation of diversity that could be possible with  
30 quantitative evaluations.

31 Limited attempts have been made to quantify nodule numbers and size in semi-  
32 controlled and especially field environments due to the sheer volume of work and labor  
33 required to accomplish root nodule phenotyping at a reasonable scale and time. This  
34 severely limits the number of experimental units that are examined. There has been some  
35 effort to identify nodulation patterns in legume roots grown in controlled or semi-controlled  
36 environments by using traditional computer vision techniques [14, 29, 30]. These techniques  
37 involve simple thresholding based segmentation of root from the background using either  
38 color alone [14] or color and texture together [29], and then detection of nodules using  
39 predefined morphological and color characteristics [14] or predefined outline/shape of the  
40 nodules [29]. These techniques were not robust enough to detect all nodules on an image,  
41 and users’ input is required where automatic detection fails. Although semi-autonomous  
42 counting methods have been developed, full automation for phenotyping is still unavailable,  
43 necessitating a reliance on qualitative ratings.

44 With the advances in phenotyping methods in plant organs [31, 32, 33] and plant stress  
45 traits [34, 35, 36, 37, 38], machine learning methods are an attractive solution to advance  
46 nodule phenotyping. Machine learning (ML) has been used in numerous plant trait  
47 phenotyping to make trait acquisition more feasible and consistent [39]. For example, in  
48 disease identification [24, 40, 41, 42], abiotic stress [43, 37], small object detection for SCN  
49 eggs [44], and yield-related traits [45, 46]. Furthermore, ML methods have helped develop

1 an end to end phenotyping pipeline to study root system architecture (RSA) traits in soybean  
2 [47, 48].

3 Due to the success of ML for trait phenotyping, we explored ML methods to develop an  
4 automated pipeline to identify and characterize nodules and root nodule distributions while  
5 reducing the amount of manual processing and counting. The objectives of this work are:  
6 (1) to develop an open-source analysis pipeline that can automatically detect nodules on  
7 diverse genotypes, and growth stages in soybean root images, and (2) provide statistics  
8 including the total number of nodules, sizes of the nodules, and nodules distribution along  
9 the tap root. We present a novel Soybean Nodule Acquisition Pipeline (SNAP) to achieve  
10 these objectives.

## 11 **2. Materials and Methods**

### 12 **2.1 Plant Materials, Root Excavation and Imaging Protocols**

13  
14 The data set for developing SNAP consisted of growing unique soybean genotypes in  
15 diverse environments with data collected across several time points. For the evaluation of  
16 SNAP, 691 images were collected from 7 unique genotypes (CL0J095-4-6, PI 80831, PI  
17 437462A, PI 438103, PI 438133B, PI 471899, IA3023), in three environments. These  
18 included Muscatine Island Research Station, Fruitland IA, in 2018 and 2019 (Soil type:  
19 Fruitland Coarse Sand), and The Horticulture Research Station, Gilbert, IA, in 2018 (Soil  
20 type: Clarion Loam modified in 1967 to a texture of sandy loam).  
21

22 Images were collected at three vegetative growth stages: V1, V3, and V5 [49]. Three  
23 seeds per experimental unit were planted, and after emergence, two were cut at the soil  
24 surface using a sharp blade to leave one standing plant per plot, therefore, each experimental  
25 unit consisted of one plant. Each plot was spaced 100 x 100 cm. At the designated growth  
26 stage, plants were tagged with barcodes and also labeled with identification strips. Soybean  
27 roots were extracted using trenching spades from a 50-cm diameter and 30-cm deep area.  
28 Extreme precaution was taken in digging the soil sample to avoid disruption in the plant  
29 roots. This was followed by gently removing the loose roots from the soil by hand, ensuring  
30 maximum nodule retention on the roots.

31 After extraction, the root from each plot was placed in a 5-gallon bucket half full of  
32 water to rinse the remaining soil from the sample. After 30 minutes, each root was placed  
33 on blue painted trays for background consistency. The tray measurements were 35 x 50 cm  
34 with a 2 cm lip. To obtain a clear 2D image of each plant root, the imaging trays were half-  
35 filled with water, and the roots were gently separated from each other to prevent increased  
36 occlusion or clumping together of the roots in each image. Each placement of the root  
37 typically took 2-3 minutes. A glass plate fitted to the size of the tray was then laid on top of  
38 the root in the water to hold it in place and then slid into an imaging platform [48]  
39 customized for this project. The platform was built from aluminum T-slot extrusion frames  
40 (80/20 Inc., Columbia City, IN) with two softbox photography lights (Neewer; Shenzhen,  
41 China), four 70-watt CFL bulbs in total, to provide consistent illumination and a Canon T5i  
42 digital SLR camera (lens: EF-S 18-55mm f/3.5-5.6 IS II) (Canon USA, Inc., Melville, NY)  
43 was mounted 55cm above the imaging plane. See Falk et al. [48] for full details. The camera  
44 was tethered to a laptop with Smart Shooter 3 photo capture and camera control software  
45 [50], to trigger image capture. Smart Shooter enabled automatic image labeling and naming  
46 by reading the tag barcode in each image, reducing human error.

47 After imaging, roots were dried in paper bags at 60°C for two days. After the roots were  
48 thoroughly dry, they were weighed for dry weight (grams), and nodules from each root were  
49 manually removed (by hand) and counted for use in the ground truth analysis. Hand removal



1 of the nodules was accomplished by trained researchers, who carefully removed each nodule  
2 with tweezers. Upon removal, a second researcher cross-validated and observed the root for  
3 any remaining nodules. This two-person unit then individually counted and recorded the  
4 number of nodules. If there was a discrepancy in the counts, that sample was recounted,  
5 ensuring that all nodules were correctly identified and counted. The removed nodules were  
6 then weighed and recorded in grams. After completing a sample and its validation, the two-  
7 person team moved on to the next sample.

## 2.2 Deep Learning and Image Processing Workflow

8  
9 The proposed workflow using deep learning (DL) and image processing is shown in  
10 Figure 2. It has two phases: 1) training, and 2) evaluation. Two DL networks were trained:  
11 (a) nodule detection network, and (b) tap root detection network. To train these networks,  
12 we selected a representative subset of the data set for annotation using submodular  
13 optimization [51]. Nodules were annotated by a human root nodule phenotyping expert,  
14 who drew bounding boxes around each nodule on 256 x 256 image patches using VGG  
15 annotator [52] (Figures S.1-3). The taproot was annotated using the full root image, and  
16 tracing was done on a Microsoft Surface computer with a Surface pen generating a line over  
17 the tap root using the edit and create tool in Microsoft Photos (Microsoft 2020). In the  
18 evaluation phase, we used the trained models to obtain the number of nodules, size  
19 distribution, and spatial distribution along the tap root.  
20  
21

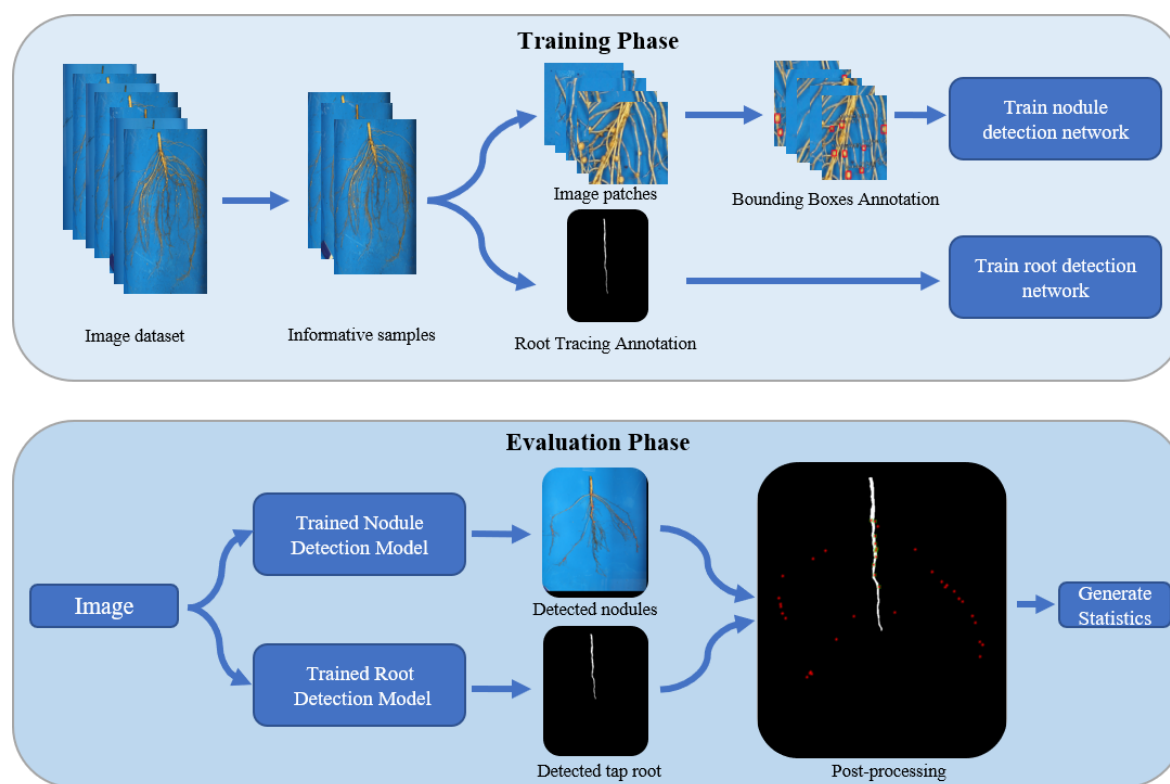

22  
23 **Figure 2:** Overview of the workflow of Soybean Nodulation Acquisition Pipeline (SNAP).  
24 The top box contains workflow for the training phase, including training of nodule detection  
25 and taproot detection. The bottom box contains workflow for the evaluation phase,  
26 including the evaluation of nodule locations and metrics and in relation to detected tap roots.  
27  
28  
29

### 2.2.1 Representative Sample Selection

We deployed an unsupervised framework based on submodular function optimization [53] to select a representative subset ( $R$ ) from the whole data set ( $W$ ) for annotation. One of the properties of this function is that incremental gain of utility by adding new samples to the subset ( $R$ ) decreases as the size of the subset grows. Thus, a small subset is maximally representative of the full dataset. We used the uncapacitated facility location function [54] as the submodular function:

$$f(R) = \sum_{w \in W} \max_{r \in R} \text{sim}(w, r) \quad (1)$$

$$\text{sim}(w, r) = \max(d) - d(w, r) \quad (2)$$

Where  $\text{sim}(w, r)$  and  $d(w, r)$  are a measure of similarity and Euclidean distance between a pair of samples  $w \in W, r \in R$ . The value of  $f(R)$  indicates the representativeness of the subset  $R$  to the whole set  $W$ . By maximizing  $f(R)$ , we selected the most representative subset  $R$ , given that  $|R| = K$ , where  $K$  is a predefined value indicating the size of subset. We used a simple greedy forward-selection algorithm [55] to maximize  $f(R)$ . The algorithm starts with  $R = \emptyset$  and iteratively adds samples  $r \in W \setminus R$  that maximally increases  $f(R)$ .

In the framework, each sample with dimensions 5000 x 3500 x 3 is input as a vector. In high dimensional space, Euclidean distance becomes less meaningful [56]. Therefore, we reduced the dimensions of the input vector using a combination of nonlinear transformation (an autoencoder) to balance an accurate reconstruction without overfitting the training data and linear transformation (principal component analysis (PCA)) to best minimize feature redundancy. First, we down-sampled the input image (5000 x 3500 x 3) using bi-linear interpolation (to 512 x 512 x 3), ensuring no visible distortion of the root. Next, we generated low-dimensional latent representation using a shallow autoencoder, then, we flattened the encoded representation and finally mapped it to 400 principal components that capture approximately 98% of the variance (Figure S.4).

### 2.2.2 Nodule Detection Framework

We approached nodule detection as a dense detection problem, as the root images have many target nodules for detection. We selected RetinaNet [56], which shows better performance than other detection frameworks for dense detection problems due to the use of “Focal Loss” as a classification loss function [56]. Focal loss function uses a scaling factor to focus on the sparse set of hard examples (foreground/nodules) and down-weights the contribution of easy (and abundant) examples (background) during training (Figure S.5).

We used the same backbone and subnetworks as Lin [56]. The backbone network was based on ResNet50-FPN and two subnetworks consisting of four 3x3 convolution layers with 256 filters, Rectified Linear Unit (ReLU), and sigmoid activation functions. Multiple anchors were used at each spatial location to detect nodules of various sizes and aspect ratios. The default anchor configurations in Lin [56] were suitable for detecting objects with 32 pixels or above in size. We changed the default configurations and optimized them for our case. We explored two different selection strategies: a) maximize overlapping between selected anchors and bounding boxes as Zlocha [57] using a differential evolution search algorithm [58], b) fit a normal distribution to the bounding box sizes and aspect ratios and make selections based on equidistant percentiles. In our case, we evaluated equidistant percentiles using several scales and aspect ratios of 3, 5, and 7, where the default anchor

1 configurations consisted of three scales ( $2^{0/3}$ ,  $2^{1/3}$ , and  $2^{2/3}$ ) and three aspects (1:2, 1:1, and  
2 2:1).

3 The base ResNet-50 models were initialized as the pre-trained model in the Coco data  
4 set [59]. The convolution layers on the subnets, except the last one, were initialized with  
5 bias  $b = 0$  and a Gaussian weight fill with  $\sigma = 0.001$ . The last layer on the classification  
6 subnet is initialized with  $b = -\log(1-\pi)/\pi$ . We set  $\pi = 0.01$ , where  $\pi$  specifies the confidence  
7 value of an anchor as foreground.

8 Data augmentation was performed by first flipping the images in horizontal and vertical  
9 directions with a 50% chance. Next, random affine transformations with rotation/shearing  
10 of up to 0.1 radians were used, followed by scaling/translation of up to 10% of the image  
11 size. To develop the trained networks and evaluate them, we utilize a standard 80% training  
12 and 20% testing set. The selections were made before data augmentation.

13 The model was trained with an Adaptive Moment Estimation (Adam) optimizer [60]  
14 with an initial learning rate of  $10^{-3}$ . Focal loss was used to train the classification  
15 subnetwork.

$$16 \quad FL(p_t) = -\alpha_t(1 - p_t)^\gamma \log(p_t) \quad (3)$$

$$17 \quad p_t = \begin{cases} p & \text{if } y = 1 \\ 1 - p & \text{otherwise} \end{cases} \quad (4)$$

19 Where  $\alpha_t$  and  $\gamma$  are scaling factors to focus on the sparse set of hard examples (nodules).  
20  $p$  is the class probability for the hard examples,  $y = 1$ . We used  $\alpha = 0.25$  and  $\gamma = 2.0$  [56].

21 The standard smooth L1 loss was used for box regression.

$$22 \quad L_{1,smooth} = \begin{cases} |x| & \text{if } |x| > \alpha \\ \frac{1}{2\alpha} x^2 & \text{if } |x| \leq \alpha \end{cases} \quad (5)$$

24 With  $\alpha = 1/9$ .  $\alpha$  is the transition point (near zero) from L1 to L2 loss.

25 The number of trainable parameters of the framework was 36,737,717. We performed  
26 data augmentation and explored the effect of batch size and scale of input image size on our  
27 dataset. The average precision (AP) [61] metric was used to evaluate the models. The AP  
28 indicates the area under the precision-recall curve after samples are ordered based on the  
29 confidence of detection.

$$30 \quad AP = \int_0^1 p(r) dr \quad (6)$$

31 Where  $p(r)$  is the precision as a function of recall.

32 All models were trained for 300 iterations on fixed training data (representative 20%  
33 samples from the dataset) and tested on a fixed test-data using 4% randomly selected  
34 samples from the dataset. Model development in the pipeline was completed using a  
35 GeForce GTX TITAN X 12 GB GPU. On average, the training time took from 10 hours to  
36 3.5 days for the models.

### 37 38 39 **2.2.3 Tap Root Detection Framework**

40 The tap root detection was approached as an image segmentation task. We deployed a  
41 Unet involving three  $2 \times 2$  maxpooling operations (down sampling) [62] with 7,708,609  
42 trainable parameters. The network consisted of three encoding/contracting blocks and three  
43 decoding/expansive blocks. Each encoding block consisted of two  $3 \times 3$  convolutions with  
44 64 feature channels, two rectified linear unit (ReLU) activations, two batch normalizations,  
45 and one dropout operation. The decoding block was the same as the encoding block, except

1 for the dropout operation. In between these encoding and decoding blocks, the output from  
2 the encoding block was down sampled using a 2 x 2 maxpooling operation followed by two  
3 3 x 3 convolutions with 128 feature channels, two rectified linear unit (ReLU) activations,  
4 two batch normalizations, and two dropout operation. The output from these operations was  
5 up-sampled using a 2 x 2 transposed convolution, followed by a concatenation operation  
6 that combines the encoder output feature channels and up-sampled feature channels. After  
7 the decoding blocks, the final layer is a 1 x 1 convolution that is used to map each of the 64  
8 channel feature vectors to the 1 channel output binary image (Figure S.6).

9 We utilized a standard 80% training and 20% testing set. The selections were made  
10 before data augmentation. Data augmentation is performed by flipping the images in  
11 horizontal and vertical directions, zooming 120%, translation in horizontal and vertical  
12 directions then 5%, rotation until 15 degrees.

13 The model was initialized using Glorot uniform initializer [63] with zero biases and  
14 trained with Adam optimizer [60] with batch size 4 and learning rate  $10^{-3}$  using a Jaccard  
15 index [64] as the loss function (Figure S.7).

$$JD = 1 - \frac{G \cap D}{G \cup D} \quad (7)$$

18 Where  $G$  is the annotated ground truth tap root image, and  $D$  is the detected tap root  
19 image.

### 20 **2.3 Hyper-parameters tuning**

21 Of the 20% representative samples used for training-data, 4% were randomly selected  
22 as test data. During hyper-parameter tuning, model training was performed on the  
23 represented samples, and model evaluation was done on the test data.

### 24 **2.4 Detection, Post-Processing and Evaluation**

25 In the trained nodule detection model, each sample was fed to the trained RetinaNet  
26 model in 256 by 256 patches. Samples were padded to ensure the image width and height  
27 were divisible by 256.

28 In order to begin elucidating spatial relationships of nodules in various root zones, we  
29 developed a method of predicting the number of nodules in the taproot location zone using  
30 a trained Unet as shown in Figure 3. Once the model identified the taproot location in the  
31 image, we dilated the taproot. We then identified the center of the detected bounding boxes  
32 around nodules which fell within the dilated taproot. We then count the bounding box  
33 centers that are within the dilated taproot zone and called these as taproot zone affiliated  
34 nodules. Further, in order to generate statistics involving the spatial distribution of the  
35 nodules along the taproot, we skeletonized the taproot and identified the nearest location on  
36 the taproot for every identified bounding box. This enabled spatial statistics assessments of  
37 nodules along the taproot related in proximity to the soil line and taproot length.



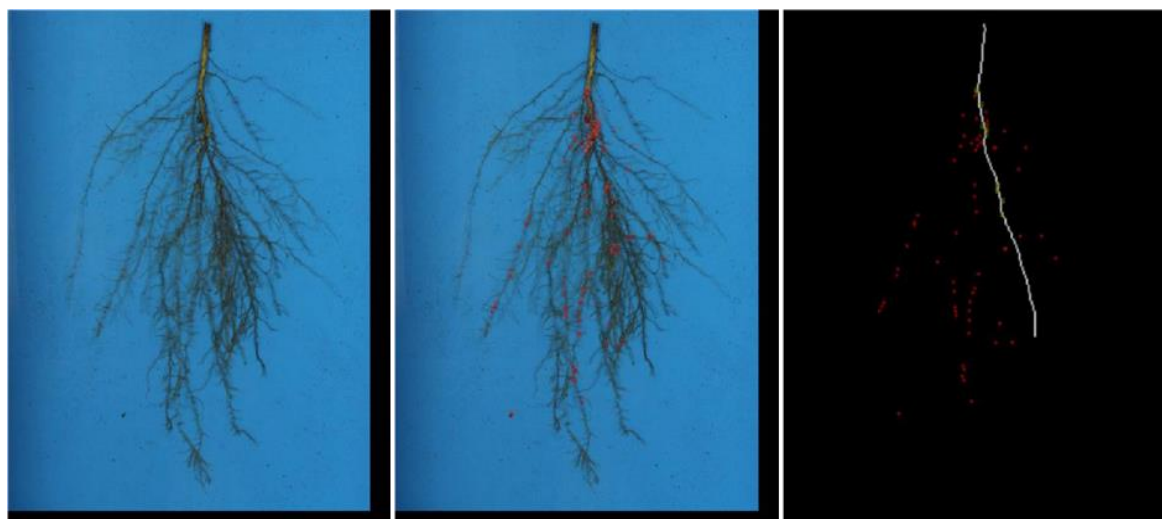

1  
2 **Figure 3:** Left) Sample input image; Center) SNAP output image with bounding boxes  
3 around predicted nodules; Right) SNAP output image with detected taproot (white) and  
4 locations of the center of the bounding boxes (red points). Nodules with the center of its  
5 bounding box within the taproot region were considered adjacent or connected to the taproot  
6 (green points).

### 7 8 **2.5 Avoiding Misclassification of Nodules and SCN Cysts**

9 To avoid potential misclassification of early developing nodules with additional  
10 structures such as Soybean Cyst Nematode (SCN) (*Heterodera glycines*) cysts, during the  
11 training phase, images with SCN cysts on the roots were included in the training dataset to  
12 enable robust, accurate classification of only nodules. When labeling nodules, care was  
13 taken not to mislabel a cyst as a nodule. To evaluate the accuracy of SNAP predicted  
14 nodules, a human expert rater evaluated each predicted nodule to ensure that it was not a  
15 cyst.

### 16 17 **2.6 SNAP Evaluation**

18 Further evaluation of SNAP was conducted to evaluate the sensitivity and precision of  
19 the pipeline nodule predictions using the following equations:

$$20 \text{ Sensitivity} = \frac{\text{TruePositives}}{\text{TruePositives} + \text{FalseNegatives}} \quad (8)$$

$$21 \text{ Precision} = \frac{\text{TruePositives}}{\text{TruePositives} + \text{FalsePositives}} \quad (9)$$

22  
23  
24  
25 Where true positive represents instances when SNAP accurately identified nodules in  
26 the image, false negative when nodules were present in the image but not identified by  
27 SNAP, and false positives were twice counted nodules or the predicted nodule was not an  
28 actual nodule.

29 To evaluate the required processing time of SNAP, the pipeline was implemented using  
30 a Python 3.6 environment on a Microsoft surface with 16 GB ram using an Intel(R)  
31 Core(TM) i7-8650U CPU @ 1.90GHz 2.11GHz.

### 3. Results

To develop a model that best quantifies nodules, a balance between computational resources and accuracy was sought. When evaluating accuracy, an increase of 20% average precision (AP; equation 6) was observed for the optimized method compared to the default, and minimal AP difference was noted when the number of scales and aspect ratios were increased (Supplemental Table S.1). The normal percentile method was computationally cheap, compared to the optimized method, and it enforces the expected normal distribution on the naturally occurring objects like nodules. No further improvement was noted for the normal percentile method with increasing scales and aspect ratios. We investigated the effect of % data annotated, batch size, and input image scale by comparing AP (Table 1).

**Table 1:** Effect of anchor selection method sizes and aspect ratios on Average Precision (AP) for SNAP evaluation of individual ML nodule detection models.

| Method            | Number of Scales | Number of Aspect Ratios | AP        |
|-------------------|------------------|-------------------------|-----------|
| Normal Percentile | 3                | 3                       | <b>59</b> |
|                   | 5                | 5                       | 58        |
|                   | 7                | 7                       | 58        |
| Optimized         | 3                | 3                       | <b>59</b> |
| Default           | 3                | 3                       | 39        |

No perceivable difference was noted on the effect of batch size. Minimal improvement was noted with the increase of percent data annotated, except at 30%, a small increase in AP was noted with an increase in input image scale. (Table 2). No major improvement was noted when the batch size was increased to 32 and 64, and the input image scale was increased to 758. The image input scales tended to over-predict nodules bigger than about 15 pixels, which roughly represents the width of the bounding box (Figure S.8). An improvement in nodule detection was noted for smaller sized nodules (<15 pixels), when the input image scale was increased from 256 to 512 scale without a continual improvement from 512 to 768 scales.

**Table 2:** Effect of batch size and input image scale for soybean nodule detection at varying percentages of annotation.

| % Data (Annotated) | Batch Size | Input Image Scale | AP        |
|--------------------|------------|-------------------|-----------|
| 10                 | 8          | 256               | 55        |
|                    | 16         | 256               | 56        |
|                    | 8          | 512               | 58        |
|                    | 16         | 512               | 58        |
| 20                 | 8          | 256               | 57        |
|                    | 16         | 256               | 59        |
|                    | 8          | 512               | 59        |
|                    | 16         | 512               | 59.5      |
| 30                 | 8          | 256               | 57        |
|                    | 16         | 256               | 59        |
|                    | 8          | 512               | 60.5      |
|                    | 16         | 512               | <b>62</b> |

### 3.1 Validation of whole root and tap root nodule counts

To determine the capability of SNAP for nodule detection, we randomly picked 10% of the root sample images not used in the ML model training and evaluation sets. The validation was performed three ways by comparisons between; (a) SNAP nodule count to human rater removed nodule count, (b) SNAP nodule count to human expert nodule count from the image, and (c) SNAP nodule count in the tap root zone to human nodule count on the taproot zone in the image (Figure 4). Examples of good and poor nodule predictions can be found in Figures S.9 and S.10.

High correlations were observed for all the three comparisons, with  $R^2$  of 0.91 in the physically removed nodules to SNAP comparison, 0.99 in the nodules counted within the image to SNAP comparison, and 0.71 in the root zone counted nodules within the image to SNAP taproot zone nodule counts. Overall, SNAP nodule count had sensitivity = 0.934 and precision = 0.951.

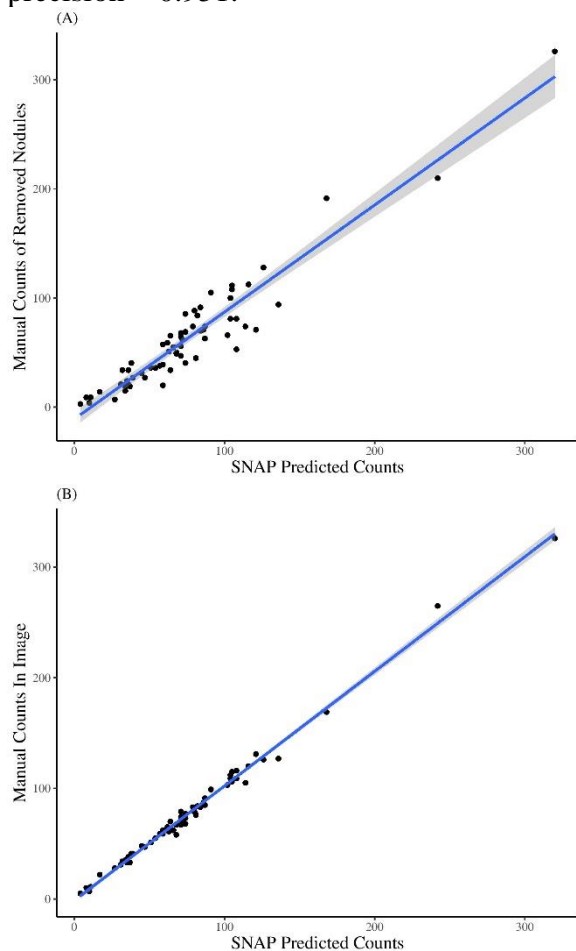

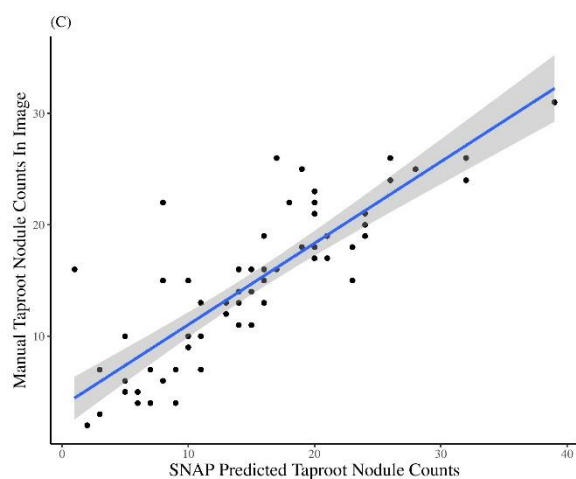

1  
2  
3 **Figure 4:** (A) Manually removed and counted nodules vs SNAP counted nodules. (B) Image  
4 counted nodules vs SNAP counted nodules. (C) Tap root image counted nodules vs SNAP  
5 counted nodules in the tap root zone.

### 6 7 **3.2 Time and labor requirements**

8 SNAP pipeline development was dependent on efficient root digging, sample  
9 preparation, including root washing, imaging, and generation of ground truth data by  
10 manual nodule harvesting and counting. Once the ML model was developed, the actual time  
11 to obtain nodule count through SNAP was dramatically reduced. Manual nodule harvesting  
12 (i.e., extraction) and sample preparation with imaging time increased per growth stage. The  
13 most time-intensive step was manual quantification (i.e., ground truth nodule counting), and  
14 the time required to remove nodules dramatically increased per growth stage. Once the ML  
15 model is trained, the most time-intensive step of manual nodule count is removed, providing  
16 SNAP users with an increase in time and resource efficiency, and an ability to work with  
17 more samples. In the course of this study, we observed that on average the manual extraction  
18 of roots takes 240, 360, and 420 seconds for V1, V3, and V5 roots, respectively. To wash  
19 and image V1, V3, and V5 roots, it took an average of 100, 128, and 150 seconds,  
20 respectively. The comparison of hand quantification of nodules and SNAP showed a  
21 dramatic change, as it took trained workers an average of 1500, 2100, and 3000 seconds per  
22 V1, V3, and V5 root, respectively; while SNAP took 90, 120, and 150 seconds per V1, V3,  
23 and V5 root, respectively (Table S.2).

## 24 25 **4. Discussion**

26 Object detection in cluttered and complicated backgrounds is an inherently challenging  
27 problem. The complexity and diversity of roots and nodules combined with root occlusion  
28 and color/texture similarities of the roots and nodules and the need for a high throughput  
29 method to routinely screen large number of genotypes necessitates a unique ML architecture  
30 to extract and quantify nodule counts and sizes. Our earlier iterations to approach this  
31 problem included segmentation and detection using classical SURF and SIFT methods [65],  
32 and a deep learning based Faster-RCNN approach [66]. However, due to poor model  
33 performance with these methods, we transitioned to RetinaNet, which showed improved  
34 accuracy and faster performance in dense object detection due to the use of focal loss  
35 function [56].

36 We combined RetinaNet and Unet, to develop SNAP that enables accurate nodule  
37 counts (91% of manual removal counted and 99% for image counted) on a soybean root and

1 generate information on the spatial distribution of nodules. SNAP provides automation in  
2 phenotyping, with a significant reduction in time to count nodules on a root. In each image,  
3 nodules were counted in about 2-3 minutes compared to another existing semi-automated  
4 pipeline, which took about 20 minutes to do similar counting [14]. The primary reduction  
5 in time was observed in SNAP compared to manual counting, with improvements by factors  
6 of 16 to 25 times depending on the growth stage.

7 SNAP offers multiple avenues for its applications in research and breeding domains.  
8 There is an active interest in learning the spatial distribution and temporal development of  
9 nodulation in crops, particularly to optimize plant performance and symbiosis with bacteria  
10 [67, 68]. SNAP can estimate the number of nodules in the taproot zone with a precision of  
11 over 70%. Upon human validation of SNAP predicted nodules, no instance was noted where  
12 an SCN cyst was misclassified as a nodule. Figure 5 shows a representative example of a  
13 complex root architecture with varying nodule sizes, and nodule and cyst distribution  
14 patterns. As SNAP is able to identify even small or newly developing nodules often missed  
15 in rater assessments, it is possible to now classify nodule development stages and quantities  
16 in correlation to vegetative growth stages or evaluate the effects of SCN on nodulation in a  
17 temporal scale using a fully automated ML cyst detection pipeline [44]. However, it is  
18 important to note that field root study samples are destructively sampled, therefore the study  
19 of nodules will require the evaluation of separate plants of the same genotypes at different  
20 time points. Through SNAP, the groundwork has been laid for future studies that can screen  
21 large breeding populations, identify and investigate QTL, and determine the relationships  
22 and correlations between root growth zones, RSA, and nodules.

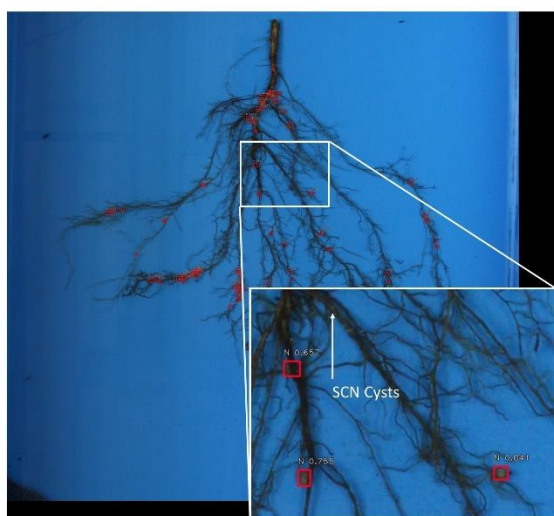

23 **Figure 5:** Image of a soybean root sample where soybean cyst nematode (SCN) cysts were  
24 present. SNAP did not detect cysts as nodules, showing its robustness.  
25  
26

27 While we utilized root samples from field experiments, SNAP can be combined with  
28 additional technologies such as mobile platforms for immediate in-field evaluation, or non-  
29 field environments, such as greenhouse, growth chamber, X-ray, and CT scan experiments  
30 to enable further solutions to breeding challenges for nodule phenotyping. SNAP based  
31 nodule counting is amenable with previously used methods such as a binned rating scale of  
32 1-10 if researchers are interested in comparative studies combining old and new research  
33 outcomes. Using the distribution generated by SNAP, a more accurate binning and count  
34 can occur, and roots can be rated automatically for comparison to each other and potentially  
35 against additional or prior studies.



1 Often breeders are unable to include root architecture and nodulation in their  
2 assessments as they are seen as unattainable and unrealistic traits to evaluate in a  
3 manageable and high throughput manner; although more recently improvements have been  
4 suggested [47, 48, 69, 70]. SNAP empowers breeders to evaluate and select genotypes that  
5 have a required level of nodulation in various biotic and abiotic conditions and accounting  
6 for genotype by environment interactions. Additionally, SNAP increases opportunities to  
7 identify and map genes controlling nodule related traits, for example, size, onset, and nodule  
8 growth coinciding with plant growth and development stages. Since SNAP was trained and  
9 evaluated on several genotypes, field locations, and vegetative growth stages, it can enable  
10 the investigation of nodulation across diverse root types and vegetative time points as well  
11 as the investigation of the growth of nodules between similar roots in a temporal scale,  
12 unraveling new scientific insights at a larger scale (i.e., more genotypes) which was  
13 previously difficult.

14 Non-soybean crop researchers working in other N-fixing crops need to validate the  
15 results of SNAP prior to its usage in their research. While we tested the success of SNAP in  
16 correctly identifying nodules discriminatively from SCN cysts, there may be other pathogen  
17 organisms, for example root knot nematode, that will require additional model training and  
18 testing prior to its deployment to study root nodules. With advances in higher resolution  
19 imaging, a SNAP type of approach in the future will be beneficial to study other beneficial  
20 plant and micro-organism interactions, such as Arbuscular mycorrhizal fungi, which can  
21 positively impact crop production [71, 72]. The combination of SNAP based nodule  
22 phenotyping in conjunction with genomic prediction forecasted on a germplasm collection  
23 is also an attractive approach to identify useful accessions for plant breeding applications  
24 spanning various maturity groups [73]

25 Improvements in SNAP functionality could be realized, for example, through the  
26 implementation of more sophisticated active learning-based representative sample selection  
27 strategy to help improve the performance of the pipeline [74], delineate nodules specifically  
28 for irregular and non-uniform non-spherical nodules to get even higher size and shape  
29 accuracy, or evaluate spatial distribution of the nodules along the lateral roots.

30 Overall, SNAP will help reduce the strain on human labor and capacity to quantify  
31 nodules consistently and accurately in N-fixing crop species and move the current state of  
32 the art in nodule phenotyping and associated applications. SNAP outputs will have  
33 usefulness for researchers and farmers, who have an interest to rapidly and accurately  
34 phenotype nodules on roots.

35  
36 **Acknowledgments:** The authors thank the many undergraduate, graduate students and staff  
37 in the Singh group at Iowa State University who helped with field experiments, data  
38 collection and imaging. Additional thanks to Koushik Nagasubramanian for his initial  
39 pipeline suggestions, and Vahid Mirnezami and Kevin Falk for assistance with the imaging  
40 system.

41  
42 **Author contributions:** C.C., Z.J., B.G., and A.K.S. conceived the project. All authors  
43 participated in the project implementation and completion. C.C. conducted experiments,  
44 imaging, and data curation. Z.J developed the machine learning and image analysis pipeline.  
45 C.C. annotated the ground truth images and assessed the pipeline output. C.C. and Z.J. wrote  
46 the manuscript draft with A.K.S and B.G. All authors contributed to the final manuscript  
47 production.  
48

1       **Funding:** This project was supported by the Iowa Soybean Research Center (A.K.S.), Iowa  
2 Soybean Association (A.K.S.), R.F. Baker Center for Plant Breeding (A.K.S.), Plant  
3 Sciences Institute (A.K.S., B.G., S.S.), Bayer Chair in Soybean Breeding (A.K.S.), and  
4 USDA CRIS project IOW04314 (A.K.S., A.S.). C.N.C. was partially supported by the  
5 National Science Foundation under Grant No. DGE-1545453. T.Z.J. was partially supported  
6 by USDA-NIFA HIPS award.  
7

8       **Competing interests:** The authors declare that there is no conflict of interest regarding the  
9 publication of this article.  
10

11       **Data Availability:** Data is freely available upon request to the corresponding authors, and  
12 the pipeline software and codes will be available at GitHub:  
13 (<https://github.com/SoylabSingh/SNAP>).  
14  
15  
16  
17  
18  
19  
20  
21  
22  
23  
24  
25  
26  
27  
28  
29  
30  
31  
32  
33  
34  
35  
36  
37  
38  
39  
40  
41  
42  
43  
44  
45  
46  
47  
48

## 1 **Supplementary Materials**

2

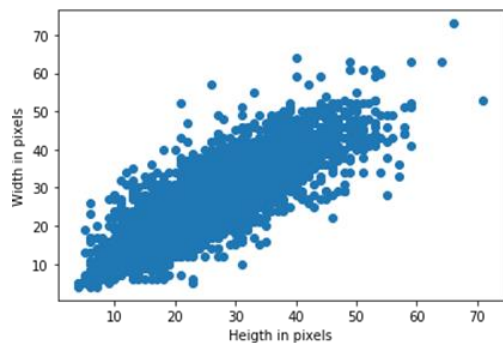

3

4

**Figure S.1:** Width and height of the annotated nodules.

5

6

7

8

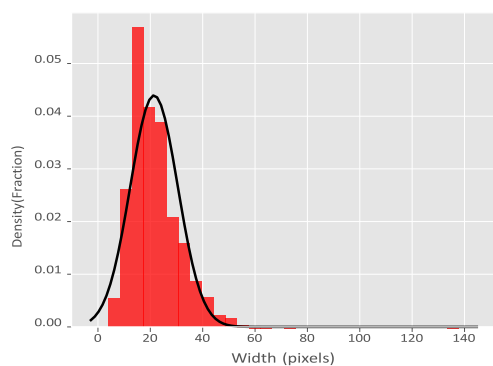

9

**Figure S.2:** Width distribution of the annotated bounding boxes for nodules from 30% of the dataset.

11

12

13

14

15

16

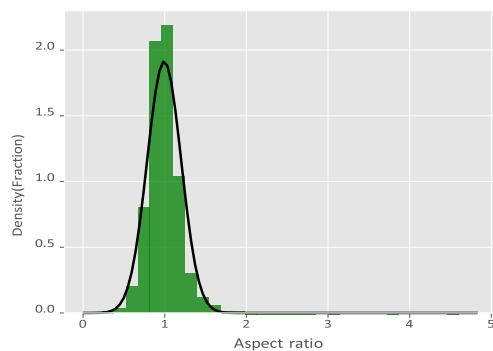

17

**Figure S.3:** Aspect ratio distribution of the annotated bounding boxes for the nodules from 30% of the dataset.

19

20

21

22

1

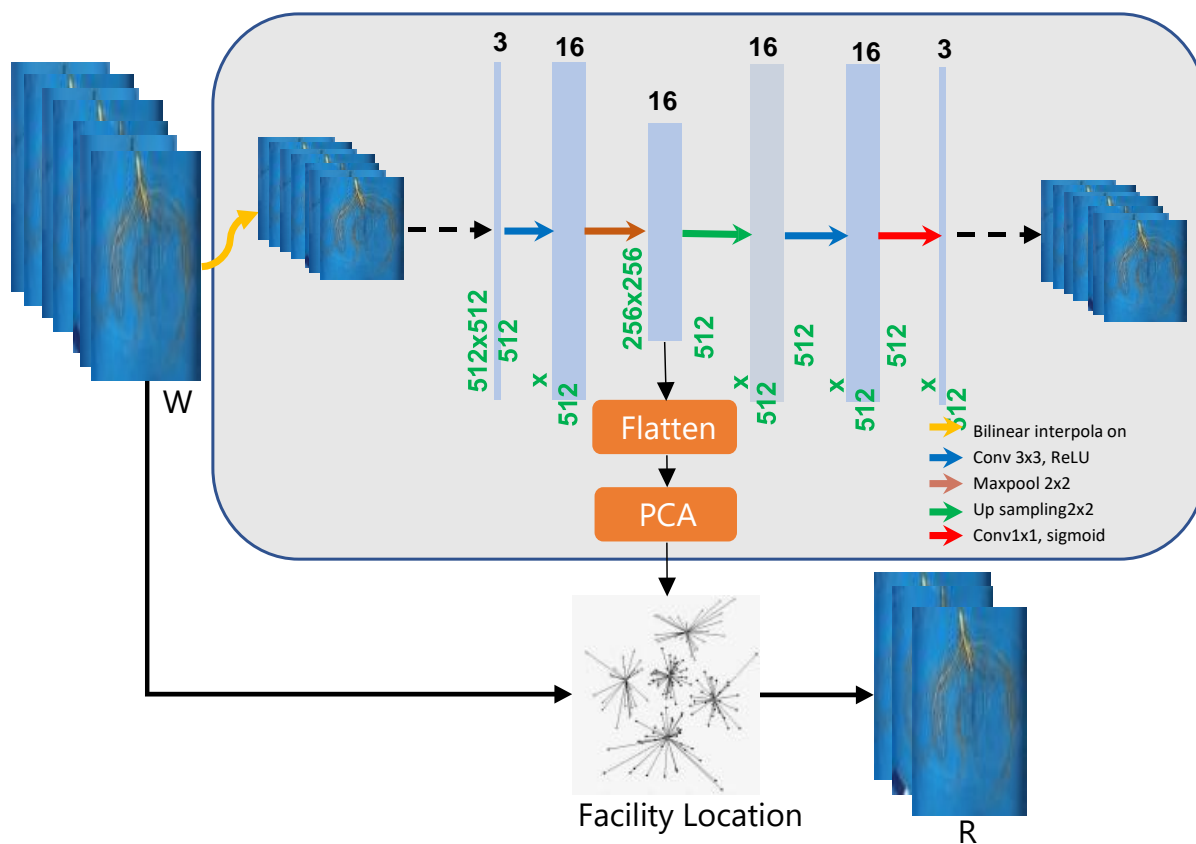

2

3

4

5

6

7

8

9

10

11

12

13

**Figure S.4:** Informative sample selection workflow. Latent features of the images ( $W$ ) were obtained via dimensionality reduction using convolution autoencoder and principal component analysis (PCA) as shown in the box. A set of information samples ( $R$ ) (with predefined size) were selected using a facility location based submodular function optimization.

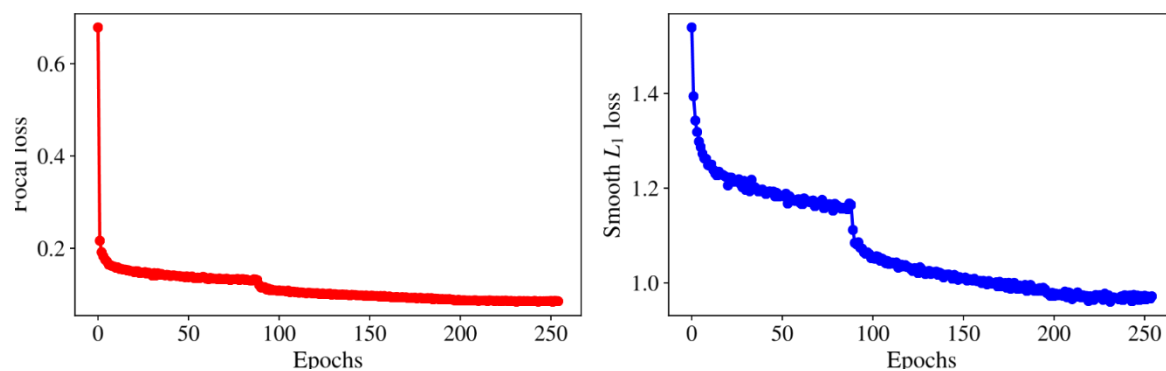

14

15

16

17

18

**Figure S.5:** Focal (classification) and regression (bounding box detection) losses during training of nodule detection network, RetinaNet, using input image scale 512, anchor scales 0.48, 0.67, 0.86, aspect ratios 0.85, 0.99, 1.13.

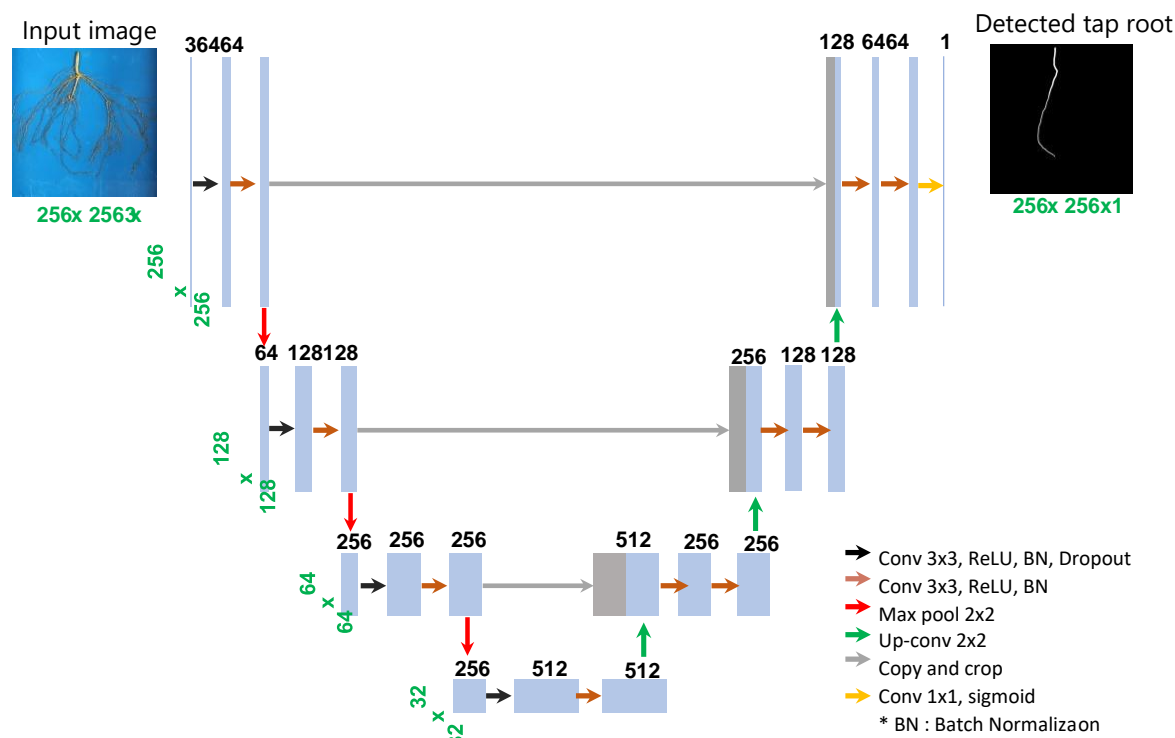

**Figure S.6:** The U-Net architecture used to develop the tap root detection model. Each blue bar represents a multi-channel feature map. The number of channels is denoted on top of the bar, and width x height is provided on the left of the box. Gray bars are copied feature maps. Colored arrows denote the different operations as indicated in the lower right arrow legend.

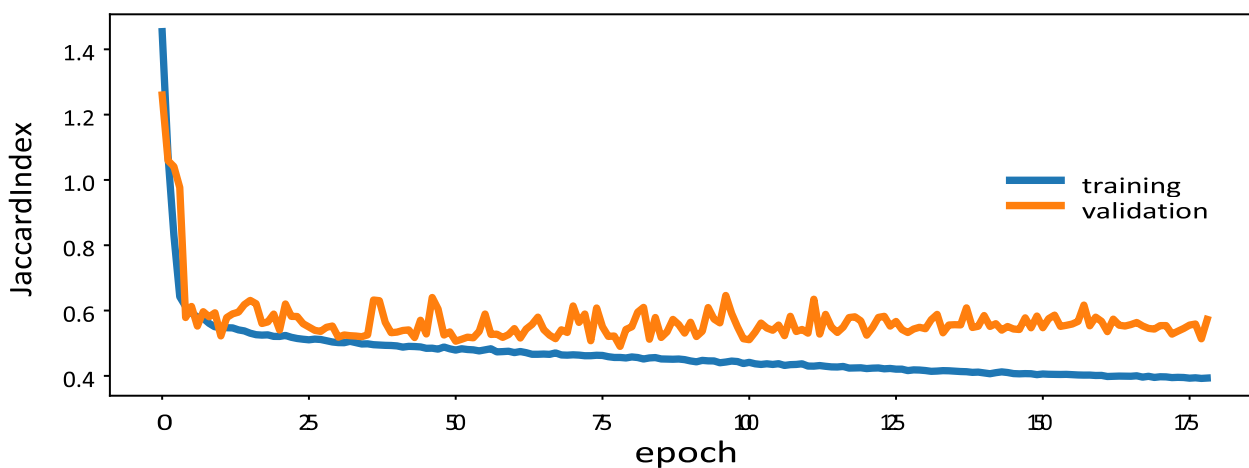

**Figure S.7:** Training and validation losses (Jaccard loss) during the training of U-Net for tap root detection.



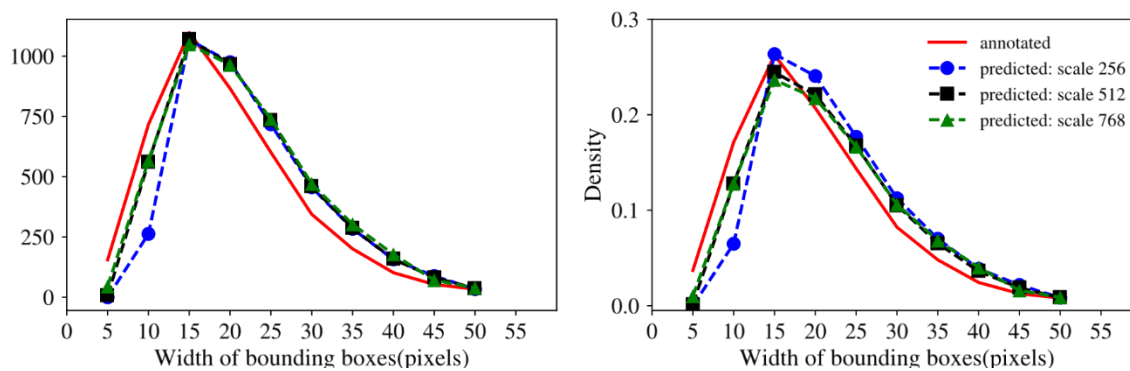

**Figure S.8:** Effect of input image scale on nodule detection in the test data. The red solid line indicates the distribution of the annotated bounding boxes in the test data and the dotted lines are the distributions of the predicted bounding boxes at different input image scales.

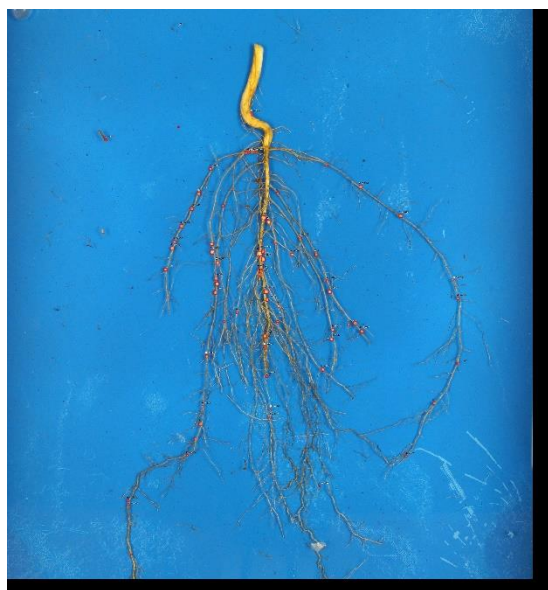

**Figure S.9:** Representative example of good nodule detection on a V5 growth stage soybean root.

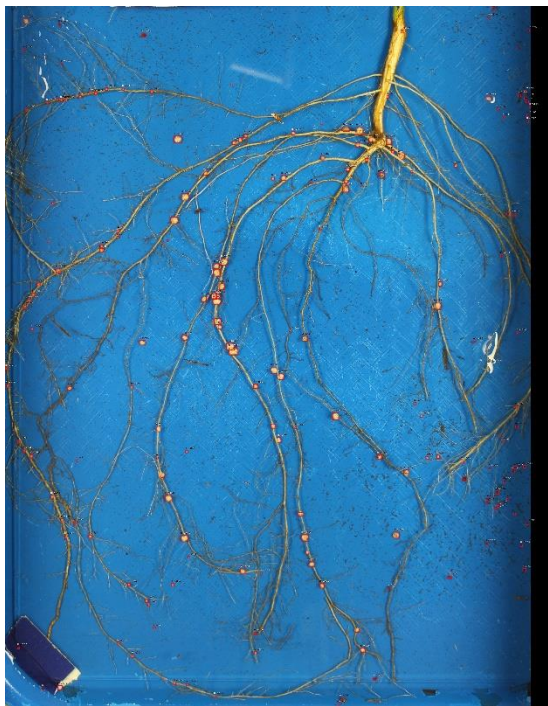

1  
2  
3  
4  
5  
6  
7  
8  
9

**Figure S.10:** A rare example of high misclassification of image debris as nodules on a V5 growth stage soybean root. While most of the actual nodules were accurately identified, additional materials in the image were misclassified as nodules.

1 **Table S.1:** Sizes, aspect ratios, and range of anchor configuration.

| Method            | Number of scales, number of aspect ratios | Anchor scales                            | Anchor aspect ratios                     | Coverage range               |
|-------------------|-------------------------------------------|------------------------------------------|------------------------------------------|------------------------------|
| Default           | 3, 3                                      | 1, 1.26, 1.59                            | 0.5, 1, 2                                | 32-813                       |
| Optimized         | 3, 3                                      | 0.4, 0.5, 0.625                          | 0.69, 1.0, 1.43                          | 13-508                       |
| Normal Percentile | 3, 3                                      | 0.48, 0.67, 0.86                         | 0.85, 0.99, 1.13                         | 15-28(P2) ...<br>245-440(P5) |
| Normal Percentile | 5, 5                                      | 0.39, 0.54, 0.67, 0.79, 0.95             | 0.79, 0.9, 0.99, 1.08, 1.2               | 12-485                       |
| Normal Percentile | 7, 7                                      | 0.32, 0.47, 0.57, 0.67, 0.76, 0.87, 1.01 | 0.74, 0.85, 0.92, 0.99, 1.06, 1.14, 1.25 | 10-512                       |

2  
3  
4  
5  
6  
7  
8

**Table S.2:** Comparison of average times taken to extract, wash and image roots in this study with average times required to hand quantify nodules compared to SNAP Quantify.

| Growth Stage | Average time required in seconds for tasks: |                 |               |               | Factors of SNAP Improvement Over Hand Quantification |
|--------------|---------------------------------------------|-----------------|---------------|---------------|------------------------------------------------------|
|              | Extraction                                  | Washing & Image | Hand Quantify | SNAP Quantify |                                                      |
| V1           | 240                                         | 100             | 1500          | 90            | 16.6 x                                               |
| V3           | 360                                         | 128             | 2100          | 120           | 17.5 x                                               |
| V5           | 420                                         | 150             | 3000          | 150           | 20.0 x                                               |

9

## 1 **References**

- 2 [1] Michael K Udvardi and Michael L Kahn. “Review article Evolution of the (Brady) Rhizobium Legume  
3 Symbiosis: Why Do Bacteroids Fix Nitrogen?” In: *Symbiosis* (1993).
- 4 [2] Jan-Peter Nap and Ton Bisseling. “Developmental biology of a plant-prokaryote symbiosis: the  
5 legume root nodule”. In: *Science* 250.4983 (1990), pp. 948–954.
- 6 [3] P Mylona, K Pawlowski, and T Bisseling. “Symbiotic Nitrogen Fixation”. en. In: *Plant Cell* 7.7 (July  
7 1995), pp. 869–885.
- 8 [4] CR Weber. “Nodulating and Nonnodulating Soybean Isolines: II. Response to Applied Nitrogen and  
9 Modified Soil Conditions 1”. In: *Agronomy Journal* 58.1 (1966), pp. 46–49.
- 10 [5] Daniel H Kohl, Georgia Shearer, and James E Harper. “Estimates of N<sub>2</sub> fixation based on differences  
11 in the natural abundance of <sup>15</sup>N in nodulating and non-nodulating isolines of soybeans”. In: *Plant*  
12 *Physiology* 66.1 (1980), pp. 61–65.
- 13 [6] S Wu and JE Harper. “Dinitrogen fixation potential and yield of hypernodulating soybean mutants: a  
14 field evaluation”. In: *Crop science* 31.5 (1991), pp. 1233–1240.
- 15 [7] RA Kluson, WJ Kenworthy, and DF Weber. “Soil temperature effects on competitiveness and growth  
16 of *Rhizobium japonicum* and on *Rhizobium*-induced chlorosis of soybeans”. In: *Plant and soil* 95.2  
17 (1986), pp. 201–207.
- 18 [8] Gustavo Caetano-Anoll’es and Peter M Gresshoff. “Nodule distribution on the roots of soybean and a  
19 supernodulating mutant in sand-vermiculite”. In: *Plant and soil* 148.2 (1993), pp. 265–270.
- 20 [9] DN Munns, VW Fogle, and BG Hallock. “Alfalfa Root Nodule Distribution and Inhibition of Nitrogen  
21 Fixation by Heat 1”. In: *Agronomy Journal* 69.3 (1977), pp. 377–380.
- 22 [10] WB Voorhees, VA Carlson, and CG Senst. “Soybean Nodulation as Affected by Wheel Traffic 1”. In:  
23 *Agronomy Journal* 68.6 (1976), pp. 976–979.
- 24 [11] Mavis I Bollman and J Kevin Vessey. “Differential effects of nitrate and ammonium supply on nodule  
25 initiation, development, and distribution on roots of pea (*Pisum sativum*)”. In: *Botany* 84.6 (2006), pp.  
26 893–903.
- 27 [12] Thomas R Sinclair and Marco A Nogueira. “Selection of host-plant genotype: the next step to increase  
28 grain legume N<sub>2</sub> fixation activity”. In: *Journal of experimental botany* 69.15 (2018), pp. 3523– 3530.
- 29 [13] Karl J Kunert et al. “Drought stress responses in soybean roots and nodules”. In: *Frontiers in plant*  
30 *science* 7 (2016), p. 1015.
- 31 [14] Lauren Remmler et al. “Standardized mapping of nodulation patterns in legume roots”. In: *New*  
32 *Phytologist* 202.3 (2014), pp. 1083–1094.
- 33 [15] Amanda M Carter and Mechthild Tegeder. “Increasing nitrogen fixation and seed development in  
34 soybean requires complex adjustments of nodule nitrogen metabolism and partitioning processes”. In:  
35 *Current Biology* 26.15 (2016), pp. 2044–2051.
- 36 [16] Dilfuza Egamberdieva et al. “Interactive effects of nutrients and *Bradyrhizobium japonicum* on the  
37 growth and root architecture of soybean (*Glycine max* L.)” In: *Frontiers in microbiology* 9 (2018), p.  
38 1000.
- 39 [17] Saoirse R Tracy et al. “Crop improvement from phenotyping roots: highlights reveal expanding  
40 opportunities”. In: *Trends in plant science* 25.1 (2020), pp. 105–118.
- 41 [18] MB Shine et al. “Glycerol-3-phosphate mediates rhizobia-induced systemic signaling in soybean”. In:  
42 *Nature communications* 10.1 (2019), pp. 1–13.

- 1 [19] D Harris, WA Breese, and JVVK Kumar Rao. “The improvement of crop yield in marginal  
2 environments using ‘on-farm’ seed priming: nodulation, nitrogen fixation, and disease resistance”. In:  
3 *Australian Journal of Agricultural Research* 56.11 (2005), pp. 1211–1218.
- 4 [20] Luiz Gustavo Moretti et al. “Can additional inoculations increase soybean nodulation and grain yield?”  
5 In: *Agronomy Journal* 110.2 (2018), pp. 715–721.
- 6 [21] Iker Aranjuelo, Cesar Arrese-Igor, and Gemma Molero. “Nodule performance within a changing  
7 environmental context”. In: *Journal of plant physiology* 171.12 (2014), pp. 1076–1090.
- 8 [22] Justin M McCoy et al. “Nitrogen fertilization of soybean affects root growth and nodulation on two  
9 soil types in Mississippi”. In: *Communications in Soil Science and Plant Analysis* 49.2 (2018), pp.  
10 181–187.
- 11 [23] Luiz Henrique Saes Zobiolo et al. “Glyphosate effects on photosynthesis, nutrient accumulation, and  
12 nodulation in glyphosate-resistant soybean”. In: *Journal of Plant Nutrition and Soil Science* 175.2  
13 (2012), pp. 319–330.
- 14 [24] Ignacio A Ciampitti and Fernando Salvagiotti. “New insights into soybean biological nitrogen  
15 fixation”. In: *Agronomy Journal* 110.4 (2018), pp. 1185–1196.
- 16 [25] Congyu Hou et al. “Field scale nitrogen load in surface runoff: Impacts of management practices and  
17 changing climate”. In: *Journal of environmental management* 249 (2019), p. 109327.
- 18 [26] R W Weaver and L R Frederick. *Effect of Inoculum Rate on Competitive Nodulation of Glycine max*  
19 *L. Merrill. I. Greenhouse Studies I*. 1974.
- 20 [27] A E Hiltbold, D L Thurlow, and H D Skipper. *Evaluation of Commercial Soybean Inoculants by*  
21 *Various Techniques I*. 1980.
- 22 [28] Berhanu Fenta et al. *Field Phenotyping of Soybean Roots for Drought Stress Tolerance*. 2014.
- 23 [29] Simeng Han et al. “Automatic detection of nodules in legumes by imagery in a phenotyping context”.  
24 In: *International Conference on Computer Analysis of Images and Patterns*. Springer. 2015, pp. 134–  
25 145.
- 26 [30] Jayme Garcia Arnal Barbedo. “Method for automatic counting root nodules using digital images”. In:  
27 *2012 12th International Conference on Computational Science and Its Applications*. IEEE. 2012, pp.  
28 159–161.
- 29 [31] Matthew Reynolds et al. “Breeder friendly phenotyping”. In: *Plant Science* (2020), p. 110396.
- 30 [32] Stijn Dhondt, Nathalie Wuyts, and Dirk Inzé. “Cell to whole-plant phenotyping: the best is yet to  
31 come”. In: *Trends in plant science* 18.8 (2013), pp. 428–439.
- 32 [33] Bashir Elnashef, Sagi Filin, and Ran Nisim Lati. “Tensor-based classification and segmentation of  
33 three-dimensional point clouds for organ-level plant phenotyping and growth analysis”. In: *Computers*  
34 *and electronics in agriculture* 156 (2019), pp. 51–61.
- 35 [34] Mohammad Kamran Omari et al. “Digital image-based plant phenotyping: a review”. In: *Korean*  
36 *Journal of Agricultural Science* 47.1 (2020), pp. 119–130.
- 37 [35] Roland Pieruschka, Uli Schurr, et al. “Plant phenotyping: past, present, and future”. In: *Plant*  
38 *Phenomics* 2019 (2019), p. 7507131.
- 39 [36] Jonathan A Atkinson et al. “Phenotyping pipeline reveals major seedling root growth QTL in hexaploid  
40 wheat”. In: *Journal of Experimental Botany* 66.8 (2015), pp. 2283–2292.
- 41 [37] Jiaoping Zhang et al. “Computer vision and machine learning for robust phenotyping in genomewide  
42 studies”. In: *Scientific Reports* 7.1 (2017), pp. 1–11.



- 1 [38] Zihao Zheng et al. “Shared genetic control of root system architecture between *Zea mays* and *Sorghum*  
2 *bicolor*”. In: *Plant Physiology* 182.2 (2020), pp. 977–991.
- 3 [39] Yu Jiang, Changying Li, et al. “Convolutional Neural Networks for Image-Based High-Throughput  
4 Plant Phenotyping: A Review”. In: *Plant Phenomics* 2020 (2020), p. 4152816.
- 5 [40] A.K. Singh, et al. “Deep learning for plant stress phenotyping: trends and future perspectives”. In:  
6 *Trends in plant science* 23.10 (2018), pp. 883–898.
- 7 [41] Sambuddha Ghosal et al. “An explainable deep machine vision framework for plant stress  
8 phenotyping”. In: *Proceedings of the National Academy of Sciences* 115.18 (2018), pp. 4613–4618.
- 9 [42] Koushik Nagasubramanian et al. “Hyperspectral band selection using genetic algorithm and support  
10 vector machines for early identification of charcoal rot disease in soybean stems”. In: *Plant methods*  
11 14.1 (2018), p. 86.
- 12 [43] Hsiang Sing Naik et al. “A real-time phenotyping framework using machine learning for plant stress  
13 severity rating in soybean”. In: *Plant Methods* 13.1 (Aug. 2017). doi: 10.1186/s13007-017-0173-  
14 7.
- 15 [44] Adedotun Akintayo et al. “A deep learning framework to discern and count microscopic nematode  
16 eggs”. In: *Scientific reports* 8.1 (2018), pp. 1–11.
- 17 [45] Kyle A Parmley et al. “Machine Learning Approach for Prescriptive Plant Breeding”. In: *Scientific*  
18 *reports* 9.1 (2019), pp. 1–12.
- 19 [46] Kyle Parmley et al. “Development of optimized phenomic predictors for efficient plant breeding de-  
20 cisions using phenomic-assisted selection in soybean”. In: *Plant Phenomics* 2019 (2019), p. 5809404.
- 21 [47] Kevin G Falk et al. “Computer vision and machine learning enabled soybean root phenotyping  
22 pipeline”. In: *Plant methods* 16.1 (2020), p. 5.
- 23 [48] Kevin G Falk et al. “Soybean Root System Architecture Trait Study through Genotypic, Phenotypic,  
24 and Shape-Based Clusters”. In: *Plant Phenomics* 2020 (2020), p. 1925495.
- 25 [49] WR Fehr et al. “Stage of development descriptions for soybeans, *Glycine Max* (L.) Merrill 1”. In:  
26 *Crop science* 11.6 (1971), pp. 929–931.
- 27 [50] Francis Hart. *KUVACODE, Smart Shooter 4 Photography Software*. url: [https://kuvacode.com/  
28 download](https://kuvacode.com/download).
- 29 [51] Satoru Fujishige. *Submodular functions and optimization*. Elsevier, 2005.
- 30 [52] Abhishek Dutta and Andrew Zisserman. “The VIA Annotation Software for Images, Audio and  
31 Video”. In: *Proceedings of the 27th ACM International Conference on Multimedia*. MM ’19. Nice,  
32 France: ACM, 2019. isbn: 978-1-4503-6889-6/19/10. doi: 10.1145/3343031.3350535. url: [https:  
33 //doi.org/10.1145/3343031.3350535](https://doi.org/10.1145/3343031.3350535).
- 34 [53] Kai Wei, Rishabh Iyer, and Jeff Bilmes. “Submodularity in data subset selection and active learning”.  
35 In: *International Conference on Machine Learning*. 2015, pp. 1954–1963.
- 36 [54] Gerard Cornuejols, Marshall Fisher, and George L Nemhauser. “On the uncapacitated location  
37 problem”. In: *Annals of Discrete Mathematics*. Vol. 1. Elsevier, 1977, pp. 163–177.
- 38 [55] Thomas H Cormen et al. *Introduction to algorithms*. MIT press, 2009.
- 39 [56] Tsung-Yi Lin et al. “Focal loss for dense object detection”. In: *Proceedings of the IEEE international*  
40 *conference on computer vision*. 2017, pp. 2980–2988.
- 41 [57] Martin Zlocha, Qi Dou, and Ben Glocker. “Improving RetinaNet for CT Lesion Detection with Dense  
42 Masks from Weak RECIST Labels”. In: *International Conference on Medical Image Computing and*  
43 *Computer-Assisted Intervention*. Springer. 2019, pp. 402–410.

- 1 [58] Rainer Storn and Kenneth Price. “Differential evolution—a simple and efficient heuristic for global  
2 optimization over continuous spaces”. In: *Journal of global optimization* 11.4 (1997), pp. 341–359.
- 3 [59] Tsung-Yi Lin et al. “Microsoft coco: Common objects in context”. In: *European conference on  
4 computer vision*. Springer. 2014, pp. 740–755.
- 5 [60] Diederik Kingma and Jimmy Ba. “Adam: A Method for Stochastic Optimization”. In: *International  
6 Conference on Learning Representations* (Dec. 2014).
- 7 [61] Yisong Yue et al. “A support vector method for optimizing average precision”. In: *Proceedings of the  
8 30th annual international ACM SIGIR conference on Research and development in information  
9 retrieval*. 2007, pp. 271–278.
- 10 [62] Olaf Ronneberger, Philipp Fischer, and Thomas Brox. “U-net: Convolutional networks for biomedical  
11 image segmentation”. In: *International Conference on Medical image computing and  
12 computerassisted intervention*. Springer. 2015, pp. 234–241.
- 13 [63] Xavier Glorot and Yoshua Bengio. “Understanding the difficulty of training deep feedforward neural  
14 networks”. In: *Proceedings of the thirteenth international conference on artificial intelligence and  
15 statistics*. 2010, pp. 249–256.
- 16 [64] Paul Jaccard. “The distribution of the flora in the alpine zone. 1”. In: *New phytologist* 11.2 (1912), pp.  
17 37–50.
- 18 [65] Herbert Bay, Tinne Tuytelaars, and Luc Van Gool. “Surf: Speeded up robust features”. In: *European  
19 conference on computer vision*. Springer. 2006, pp. 404–417.
- 20 [66] Shaoqing Ren et al. “Faster r-cnn: Towards real-time object detection with region proposal networks”.  
21 In: *Advances in neural information processing systems*. 2015, pp. 91–99.
- 22 [67] Shuchi Smita et al. “Gene regulatory networks associated with lateral root and nodule development in  
23 soybean”. In: *in silico Plants* 2.1 (2020), diaa002.
- 24 [68] Sonali Roy et al. “Celebrating 20 years of genetic discoveries in legume nodulation and symbiotic  
25 nitrogen fixation”. In: *The Plant Cell* 32.1 (2020), pp. 15–41.
- 26 [69] Alexander Bucksch et al. “Image-based high-throughput field phenotyping of crop roots”. In: *Plant  
27 Physiology* 166.2 (2014), pp. 470–486.
- 28 [70] Larry M York. “Phenotyping crop root crowns: general guidance and specific protocols for maize,  
29 wheat, and soybean”. In: *Root Development*. Springer, 2018, pp. 23–32.
- 30 [71] Ram Swaroop Meena et al. “Response and interaction of Bradyrhizobium japonicum and arbuscular  
31 mycorrhizal fungi in the soybean rhizosphere”. In: *Plant Growth Regulation* 84.2 (2018), pp. 207–  
32 223.
- 33 [72] Walid Ellouze et al. “Potential to breed for mycorrhizal association in durum wheat”. In: *Canadian  
34 journal of microbiology* 62.3 (2016), pp. 263–271.
- 35 [73] Leonardo de Azevedo Peixoto et al. “Leveraging genomic prediction to scan germplasm collection for  
36 crop improvement”. In: *PLoS one* 12.6 (2017), e0179191.
- 37 [74] Koushik Nagasubramanian et al. “How useful is Active Learning for Image-based Plant Phenotyping?”  
38 In: *arXiv preprint arXiv:2006.04255* (2020).
